# Supplementary figures and images for: Schizophrenia Treatment Coverage Provided by the Public and Private Health Systems of Chile
Source: Atypon-hosted journal article supplement (doi:10.1176/appi.ps.202000018), 2020-12-18

Figure 1: Health System in Chile with GES plan

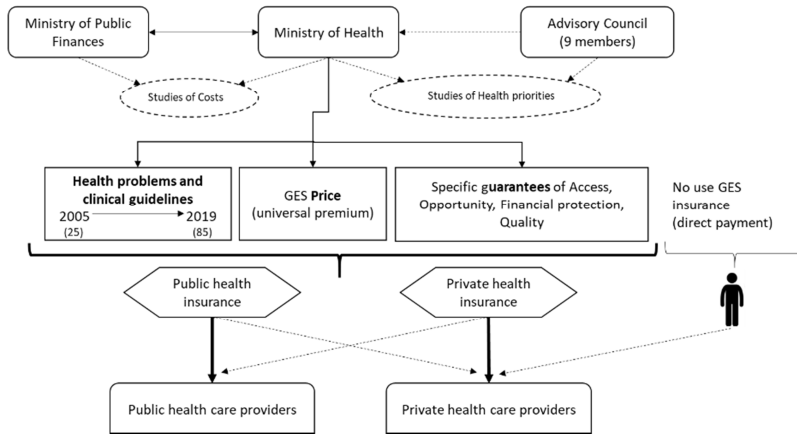

Supplement: appi.ps.202000018.ds001.pdf [file appi.ps.202000018.ds001.pdf]
